# Supplementary material
Source: PubMed Central journal article supplement (PMC4677754)

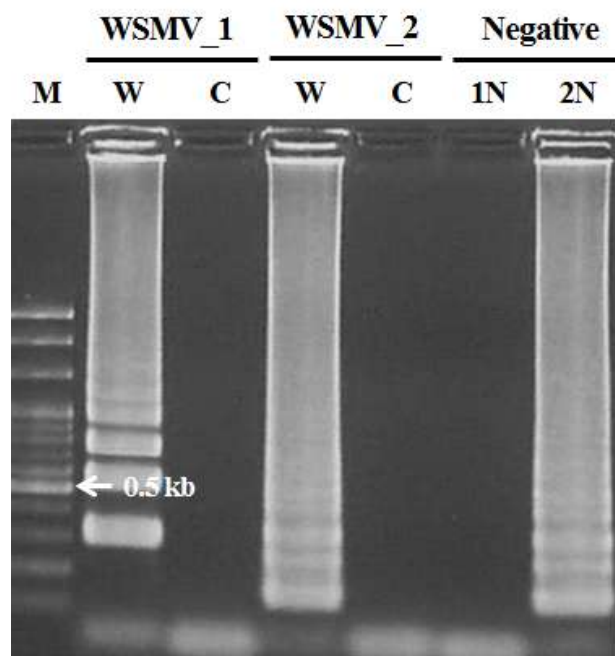

Supplementary Fig. S1.

*Bfal*  
treatment

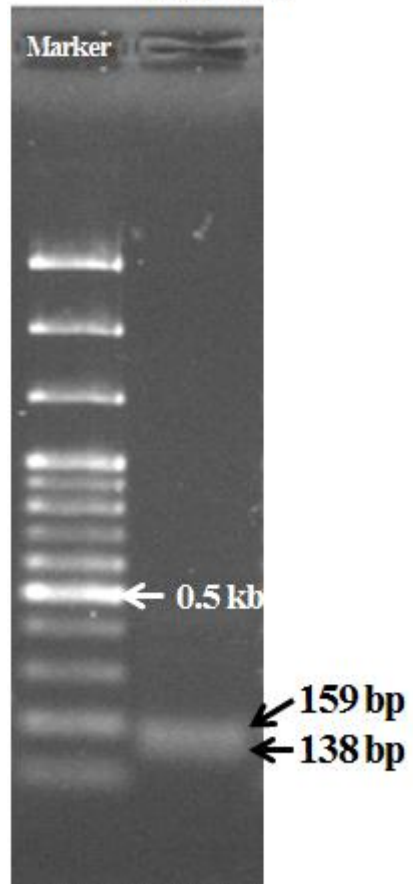

Supplementary Fig. S2.

Supplement: ppj-31-438-suppl.pdf [file ppj-31-438-suppl.pdf]
